# Supplementary material for: Selection of reliable reference genes for quantitative RT-PCR in garlic under salt stress
Source: PeerJ. 2019 Jul 16;7:e7319. doi: 10.7717/peerj.7319 (PMC6640627; doi:10.7717/peerj.7319)
Supplement: Table S3 [file peerj-07-7319-s003.xlsx]

## Sheet: expression
Table S3. Raw Ct values of the eight candidate genes in garlic samples under salt stress
		eIF-4α	Actin	TUB7	TIP41	GAPDH	SAND	EF	PP2A
	0h	25.3	25.32	27.59	27.08	32.56	28.6	23.86	27.47
		25.27	25.02	27.69	26.94	33.11	28.65	23.55	27.58
		25.11	24.96	27.59	26.65	32.77	28.49	23.5	27.31
		29.76	30.36	32.59	33.34	33.51	33.75	30.01	31.27
		30.88	30.42	32.18	33.17	33.72	34.53	29.72	31.03
		29.57	30.01	31.91	32.7	33.82	33.71	29.59	31.34
		28.86	31.25	34.07	35.44	33.4	34.76	31.33	27.93
		28.46	30.31	34.43	35.83	33.25	34.05	31.09	27.48
		29.14	31.12	33.16	33.8	32.41	33.65	31.09	27.65
	1h	25.45	25.14	27	26.87	35.1	28.92	23.63	27.61
		25.51	24.81	27.14	26.69	34.59	28.71	23.72	27.55
		25.53	25.02	27.01	26.47	34.41	28.83	23.8	27.37
		28.66	30.45	33.69	31.66	33.83	34.73	23.91	31.82
		29.15	30.66	33.15	32.93	32.82	32.73	24.25	32.21
Clove		28.71	30.53	32.33	32.37	32.88	34.53	24.27	32.48
		30.57	27.45	29.52	29.13	33.49	32.75	27.71	29.83
		30.65	28.06	29.14	29.03	33.4	32.2	28.09	29.57
		30.42	27.55	29.3	29.03	33.73	32.08	27.45	29.93
	4h	25.93	24.26	25.34	27.9	33.69	28.27	22.23	27.15
		26.01	24.33	25.43	27.63	35.03	28.09	22.61	27.55
		25.99	24.68	25.68	27.3	33.95	28.53	23.01	27.38
		26.47	26.74	29.71	27.76	32.3	31.27	25.31	27.74
		26.71	26.78	29.91	27.8	31.54	30.22	25.01	27.57
		26.74	26.79	29.34	27.82	32.24	30.64	25.58	27.8
		26.48	26.07	27.17	26.49	32.86	31.12	24.37	27.82
		26.76	25.99	27.24	26.32	33.99	31.69	24.51	28.43
		26.7	25.63	27.08	26.31	34.38	31.43	25.19	28.01
	12h	24.81	23.84	25.23	26.56	33.16	27.66	21.7	26.17
		25.24	23.84	25.41	26.24	34.61	27.22	22.4	26.77
		25.3	23.87	26.01	26.36	34.17	28.54	21.83	26.51
		28.63	28.17	29.95	29.08	32.12	32.81	24.75	29.76
		28.58	28.2	30.45	28.7	33.16	32.91	25.24	30.32
		28.65	28.42	30.01	28.98	33.28	33.88	25.27	30.58
		31.34	29.25	33.17	30.8	35.17	34.02	29.97	31.67
		31.58	29.64	33.28	31.05	35.15	33.01	29.23	31.39
		31.82	29.19	33.03	30.9	36	33.91	30.52	32.17
	0h	30.68	28.94	32.88	32.89	32.13	34.75	26.55	30.42
		29.18	28.66	31.92	32.74	32.52	34.51	25.69	30.12
		29.83	28.35	31.85	32.86	33.95	35.1	25.83	30.16
		27.63	30.27	32.16	33.1	32.19	33.61	29.08	27.51
		27.08	28.54	31.2	32.89	33.67	34.01	28.65	27.41
		27.48	29.27	31.35	32.71	31.58	33.83	28.13	27.4
		26.9	26.85	28.38	28.47	32.44	31.69	23.89	27.34
		27.12	26.56	28.21	28.6	32.8	31.23	24.29	27.78
		26.92	26.28	28.09	28.43	31.61	30.54	23.85	27.75
	1h	29.59	29.61	33.21	32.79	34.15	35.62	25.37	30.46
		29.32	29.28	31.65	33.62	34.34	34.39	26.69	31
		29.29	29.44	31.43	32.08	34.03	35.38	26.26	31.13
		26.84	25.22	27.02	26.97	33.3	30.28	23.45	25.61
Root		26.46	25.1	27.08	26.28	33.69	29.15	23.31	26.74
		26.32	25.34	27.03	26.16	33.47	30.15	23.3	26.29
		28.28	27.66	30.05	30.98	32.41	33.25	26.55	28.22
		29.15	28.23	29.77	30.69	31.35	33.41	26.69	28.93
		29.23	27.57	29.8	30.95	32.57	32.71	26.62	28.57
	4h	30.79	28.78	33.92	33.98	33.32	35.31	28.94	30.61
		31.4	28.86	33.86	33.23	33.47	36.21	29.43	31.23
		30.8	29.03	34.61	33.27	33.12	34.98	29.31	31.46
		26.3	25.54	27.62	27.7	33.93	30.46	22.97	26.93
		26.27	25.51	27.83	27.87	34.35	30.02	23.41	26.76
		26.25	25.53	27.67	27.79	34.24	31.26	24.2	26.41
		26.51	25.58	27.58	27.95	31.6	31.41	24.16	26.87
		26.36	25.53	27.91	28.17	31.12	31.01	23.4	27.26
		26.42	25.47	27.63	28.14	31.17	30.41	23.36	26.75
	12h	30.49	28.74	31.77	30.51	33.3	34.11	27.64	31.17
		30.1	29.48	31.48	31.29	33.38	34.38	27.45	31.94
		30.31	30.03	31.77	31.14	32.62	34.52	27.61	32.02
		28.02	27.48	30.07	30.22	33.36	32.05	27.42	27.39
		28.03	27.62	29.92	30.45	32.41	32.04	27.9	28.86
		28.78	27.86	30.07	30.48	32.82	31.78	26.81	27.05
		26.05	25.18	27.13	27.27	31.2	30.43	23.66	25.83
		26.19	25.24	27.24	27.51	31.48	30.73	23.93	26.69
		26.23	25.14	27.53	27.42	32.87	30.45	24.83	27
	0h	31.97	30.33	33.31	30.6	26.23	33.78	26.68	30.63
		32.08	30.42	33.09	30.73	27.16	34.3	26.4	30.47
		32.33	30.05	32.91	30.34	27	33.95	26.68	30.85
		30.51	28.67	31.21	30.91	26.37	34.06	27.22	30.86
		30.81	28.89	31.06	30.93	26.33	33.75	26.24	30.17
		30.43	28.64	30.54	29.02	25.85	34.02	26.6	30.72
		27.22	25.21	27.39	28.91	24.02	31.4	22.87	27.71
		27.25	25.2	27.16	28.39	23.21	31.32	23.03	27.78
		27.24	24.85	26.75	28.21	23.33	31.04	22.22	27.43
	1h	26.74	25.96	27.27	27.75	24.05	31.1	23.5	29.21
		26.63	25.71	27.54	28.13	23.7	30.32	23.38	28.98
		26.55	25.61	27.41	28.39	23.56	30.7	24.11	28.97
		28.67	28.06	29.44	29.5	25.83	32.19	25.41	30.63
		28.7	27.84	29.61	29.79	25.63	32.14	25.23	30.52
Leaf		28.54	27.76	29.31	30.24	25.71	32.06	25.32	30.16
		26.1	25.26	27.32	27.2	23.54	30	23.34	28.11
		26.35	25.27	27.19	27.22	23.41	29.64	23.15	28.14
		26.12	24.86	27.02	27.46	23.29	29.97	23.15	27.94
	4h	32.58	30.07	34.27	33.95	29.63	33.72	29.44	32.78
		32.55	30.49	33.94	34.06	29.89	33.51	29.34	33.02
		32.64	30.6	33.29	34.2	30.48	34.02	29.86	32.91
		30.17	29.4	30.91	31.32	26.36	33.36	25.65	31.69
		30.1	29.43	31.25	30.56	26.99	33.13	26.36	32.03
		29.9	29.4	30.75	31.47	25.77	32.69	26.81	31.01
		29.61	27.98	29.41	29.88	24.85	33.24	25.67	30.39
		30	28.06	29.54	28.56	24.5	32.85	25.23	31.09
		29.71	27.95	29.22	29.1	25.26	33.58	25.27	30.65
	12h	28.3	28.06	29.47	30.64	26.67	32.35	24.85	30.41
		28.34	27.82	29.93	30.13	26.57	32.18	24.04	31.1
		28.32	28.36	30.21	30.29	26.89	33.24	24.82	31.03
		29.08	28.44	30.04	29.43	27.06	32.78	24.8	30.1
		29.1	28.81	30.17	29.36	26.69	32.38	24.46	30.54
		29.11	28.69	30.33	29.56	27.44	32.08	25.3	30.33
		30.44	29.22	32.07	31.13	27.22	34.1	27.1	31.08
		30.82	29.01	32.04	31.72	27.14	33.55	27.31	31.46
		30.79	29.07	32.02	31.6	26.46	33.75	27.4	30.95
