# Supplementary material for: Selection of reliable reference genes for quantitative RT-PCR in garlic under salt stress
Source: PeerJ. 2019 Jul 16;7:e7319. doi: 10.7717/peerj.7319 (PMC6640627; doi:10.7717/peerj.7319)
Supplement: Table S4 [file peerj-07-7319-s004.xlsx]

## Sheet: sequences
Table S4. Primer sequences of ascorbate oxidase for qRT-PCR
Gene symbol	Gene function	Primer sequences (Forward)	Primer sequences (Reverse)
AO	Ascorbate oxidase	TTGTTGCTCCTGACACTCCAATGAA	GCGATATGCCAAGACTGAACGATATTC
